# Supplementary material
Source: Springer Nature journal article supplement (https://www.springermedizin.de/resource/supplementary/12885_2013_4361_MOESM1_ESM.pdf/9466312)

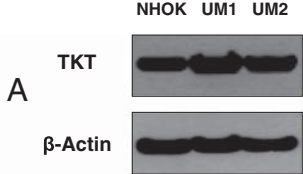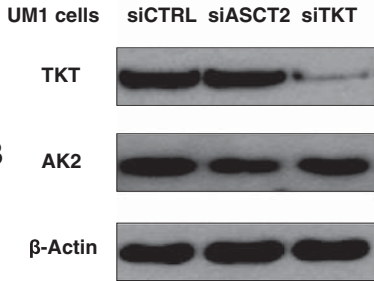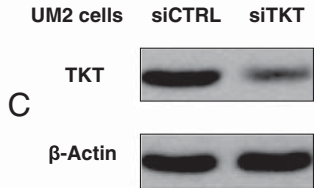

Supplement: MOESM1 [file 9466312]
